# Supplementary material for: The adaptive value of camouflage and colour change in a polymorphic prawn
Source: PubMed Central journal article supplement (PMC6207773; doi:10.1038/s41598-018-34470-z), 2018-10-30
Supplement: 41598_2018_34470_MOESM2_ESM.pdf [file 41598_2018_34470_MOESM2_ESM.pdf]

## **Supplementary information**

### **The adaptive value of camouflage and colour change in a polymorphic prawn**

Rafael Campos Duarte<sup>a,b,\*</sup>, Martin Stevens<sup>c</sup>, and Augusto Alberto Valero Flores<sup>a</sup>

a – Centro de Biologia Marinha, Universidade de São Paulo. Rod. Manoel Hypólito do Rego, km 131.5, São Sebastião, SP, Brazil. 11612-109.

b – Programa de Pós-Graduação em Biologia Comparada, Faculdade de Filosofia, Ciências e Letras de Ribeirão Preto, Universidade de São Paulo, Ribeirão Preto, Brazil.

c – Centre for Ecology and Conservation, University of Exeter, Penryn Campus, Penryn. TR10 9FE, UK.

\* Corresponding author. E-mail: rafaduarte87@usp.br

**Table S1.** Summary results of seahorse visual modelling. Results of the two-way analyses of variance testing differences in “just-noticeable differences (JND), derived from two visual modelling scenarios (see Methods), according to combinations of *Hippolyte obliquimanus* colour morphs (brown or pink) and seaweed backgrounds (*Galaxaura marginata* and *Sargassum furcatum*) (upper table). The mean JND values and respective 95% confidence intervals (lower and upper bounds) for the different combinations between factors are shown in the lower table. Note that both models resulted in overlapping JND 95% confidence intervals for all factor combinations.

| Source of variation | df | Model 1 |       |     | Model 2 |        |     |
|---------------------|----|---------|-------|-----|---------|--------|-----|
|                     |    | MS      | F     | p   | MS      | F      | p   |
| Prawn morph (M)     | 1  | 35.747  | 21.50 | *** | 26.144  | 17.25  | *** |
| Seaweed habitat (S) | 1  | 86.599  | 52.08 | *** | 177.966 | 117.40 | *** |
| M x S               | 1  | 150.363 | 90.43 | *** | 165.274 | 109.02 | *** |
| Residual            | 56 | 1.663   |       |     | 1.516   |        |     |

  

| Factor combinations    | Model 1 |             |             | Model 2 |             |             |
|------------------------|---------|-------------|-------------|---------|-------------|-------------|
|                        | mean    | 95% CI      |             | mean    | 95% CI      |             |
|                        |         | lower bound | upper bound |         | lower bound | upper bound |
| Brown <i>Galaxaura</i> | 3.621   | 2.963       | 4.279       | 3.858   | 2.998       | 4.718       |
| Brown <i>Sargassum</i> | 2.857   | 1.806       | 3.908       | 3.983   | 3.262       | 4.704       |
| Pink <i>Galaxaura</i>  | 1.998   | 1.623       | 2.373       | 1.859   | 1.477       | 2.241       |
| Pink <i>Sargassum</i>  | 7.567   | 6.964       | 8.170       | 8.623   | 7.947       | 9.299       |

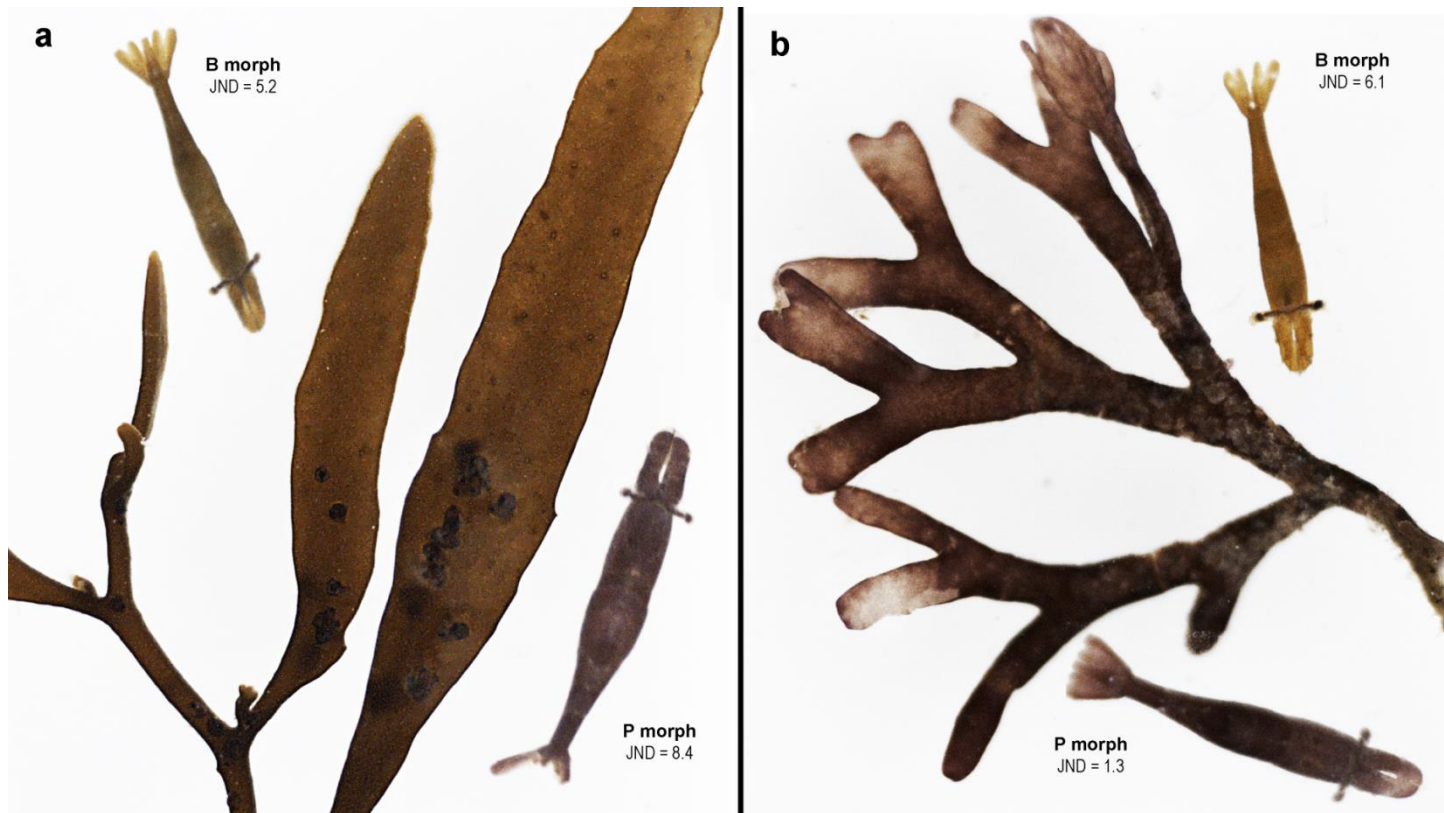

**Figure S1** – Differential camouflage of *Hippolyte obliquimanus* colour morphs on the seaweeds *Sargassum furcatum* and *Galaxaura marginata* to the vision of the seahorse *Hippocampus subelongatus*. False-colour seahorse images of brown (B) and pink (P) prawns on *Sargassum* (a) and *Galaxaura* (b) seaweeds are made from a combination of the blue, green and red channels (corresponding to the mapped shortwave, mediumwave and longwave images of seahorse receptors, respectively). Here, resulting images were square-root-transformed from linear cone-catch photos only for display purposes only. Average JND values resulting from comparing each prawn to the respective seaweed using the Vorobyev-Osorio model are also shown (see main text).
